# Supplementary material for: Molecular diagnostic assays based on cpn60 UT sequences reveal the geographic distribution of subgroup 16SrXIII-(A/I)I phytoplasma in Mexico
Source: PubMed Central journal article supplement (PMC5430490; doi:10.1038/s41598-017-00895-1), 2017-04-19
Supplement: 41598_2017_895_MOESM1_ESM.pdf [file 41598_2017_895_MOESM1_ESM.pdf]

## SCIENTIFIC REPORTS

### Supplementary information

Molecular diagnostic assays based on *cpn60* UT sequences reveal the geographic distribution of subgroup 16SrXIII-(A/I)I phytoplasma in Mexico

Edel Pérez-López<sup>a †</sup>, Douglas Rodríguez-Martínez<sup>b</sup>, Chrystel Y. Olivier<sup>c</sup>, Mauricio Luna-Rodríguez<sup>d</sup> and Tim J. Dumonceaux<sup>c,e,\*</sup>

<sup>a</sup>Instituto de Biotecnología y Ecología Aplicada (INBIOTECA), Universidad Veracruzana, Avenida de Las Culturas Veracruzanas, Xalapa, Veracruz, México.

<sup>b</sup>Departamento de Investigación Aplicada, Driscoll's, Zapopan, Jalisco, México.

<sup>c</sup>Agriculture and Agri-Food Canada, Saskatoon Research Centre, Saskatoon, Saskatchewan, Canada.

<sup>d</sup>Laboratorio de Alta Tecnología de Xalapa, Universidad Veracruzana, Xalapa, Veracruz, México.

<sup>e</sup>Department of Veterinary Microbiology, University of Saskatchewan, Saskatoon, Saskatchewan, Canada.

<sup>†</sup>Current address: Department of Entomology and Plant Pathology, Auburn University, Auburn, AL 36849, USA

\*Corresponding author. **E-mail:** [tim.dumonceaux@agr.gc.ca](mailto:tim.dumonceaux@agr.gc.ca); **Tel:** 1-306-385-9450; **Fax:** 1-306-385-9482

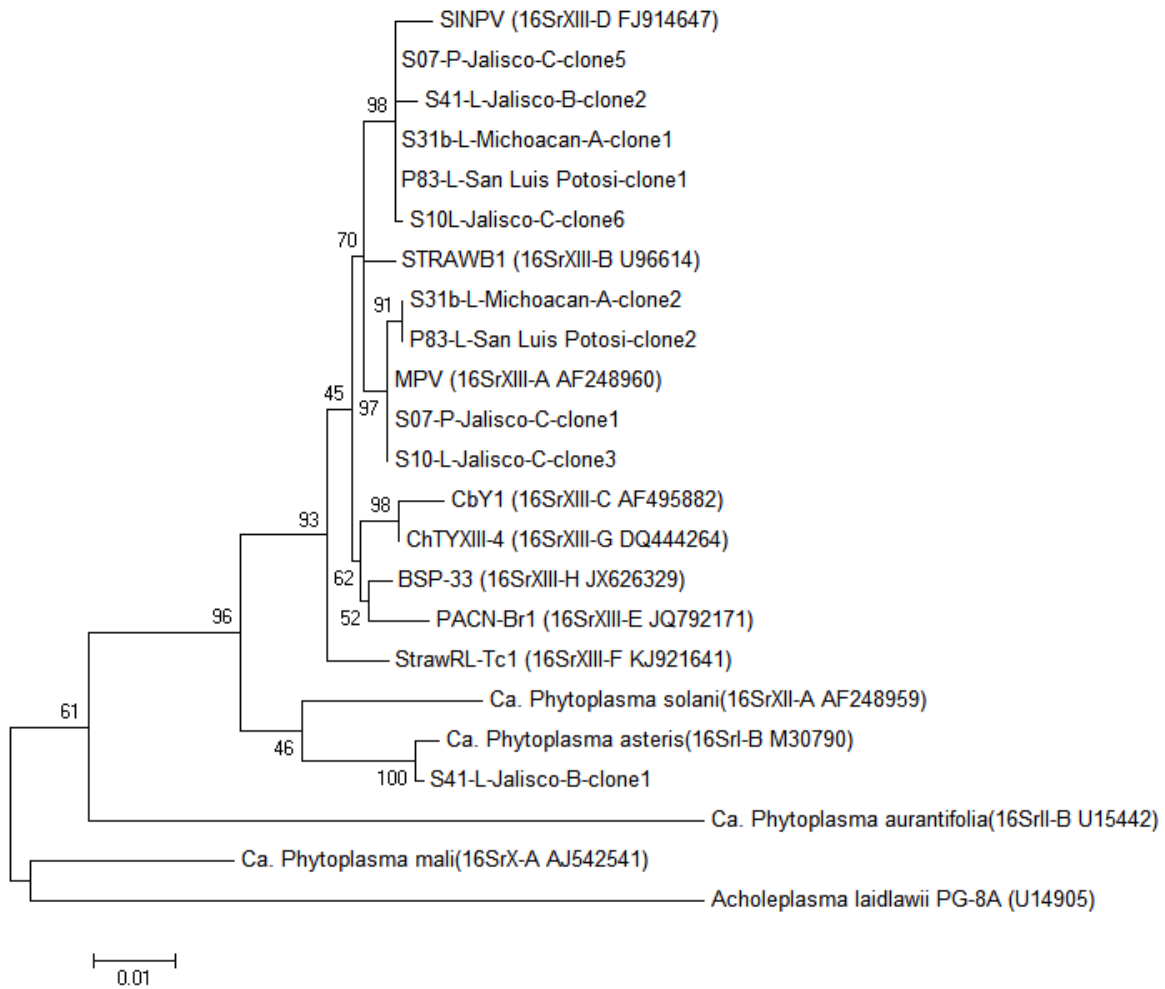

**Figure S1.** Phylogenetic tree reconstructed through the maximum likelihood method of the F2nR2 sequences obtained from samples S07-P-JC, S41-L-JB, and S10-L-JC, along with previously characterized phytoplasma strains. Accession numbers of the F2nR2 sequences obtained for the samples mentioned above are in the main text. Phylogenetic analysis was conducted using the maximum likelihood method with MEGA v6.0<sup>1</sup> and bootstrapping 1000 times to estimate stability. *Acholeplasma laidlawii* strain PG-8 A (U14905) was used as outgroup to root the tree. Bar, 1 substitution in 100 positions.

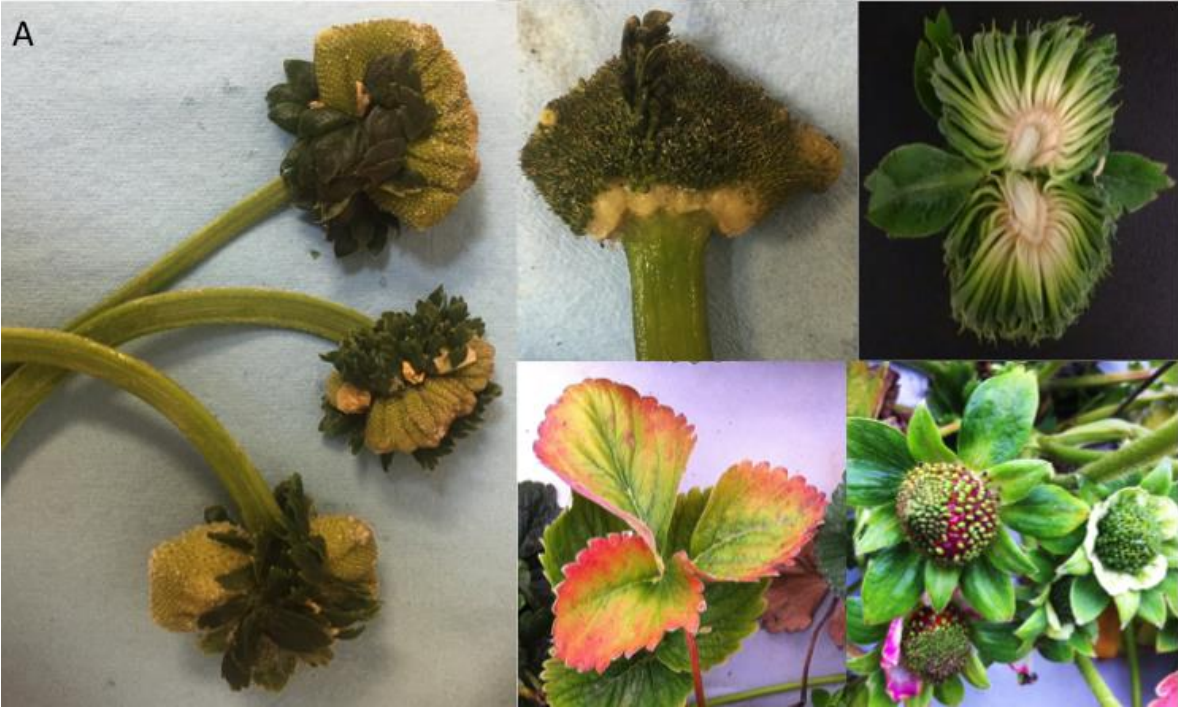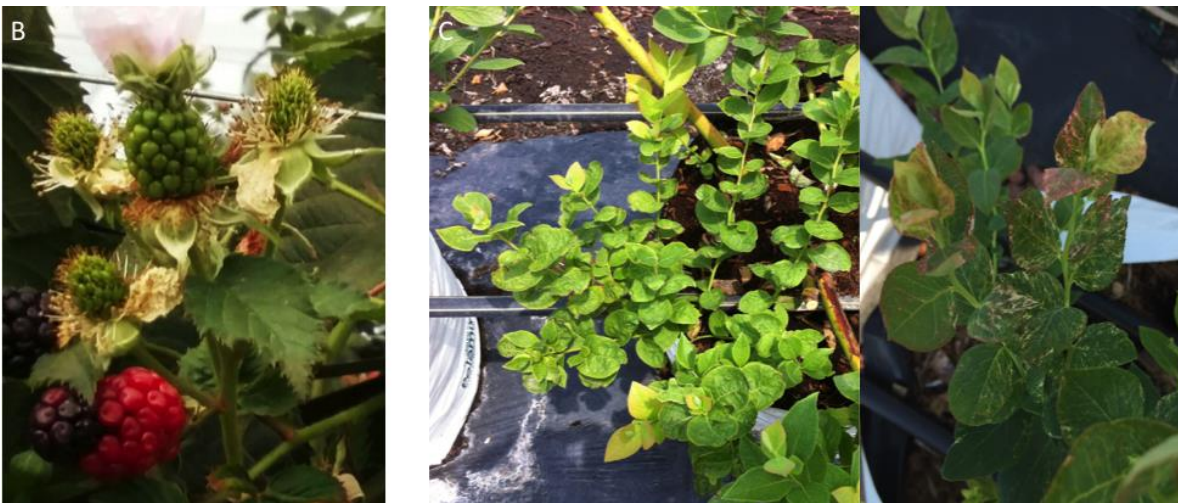

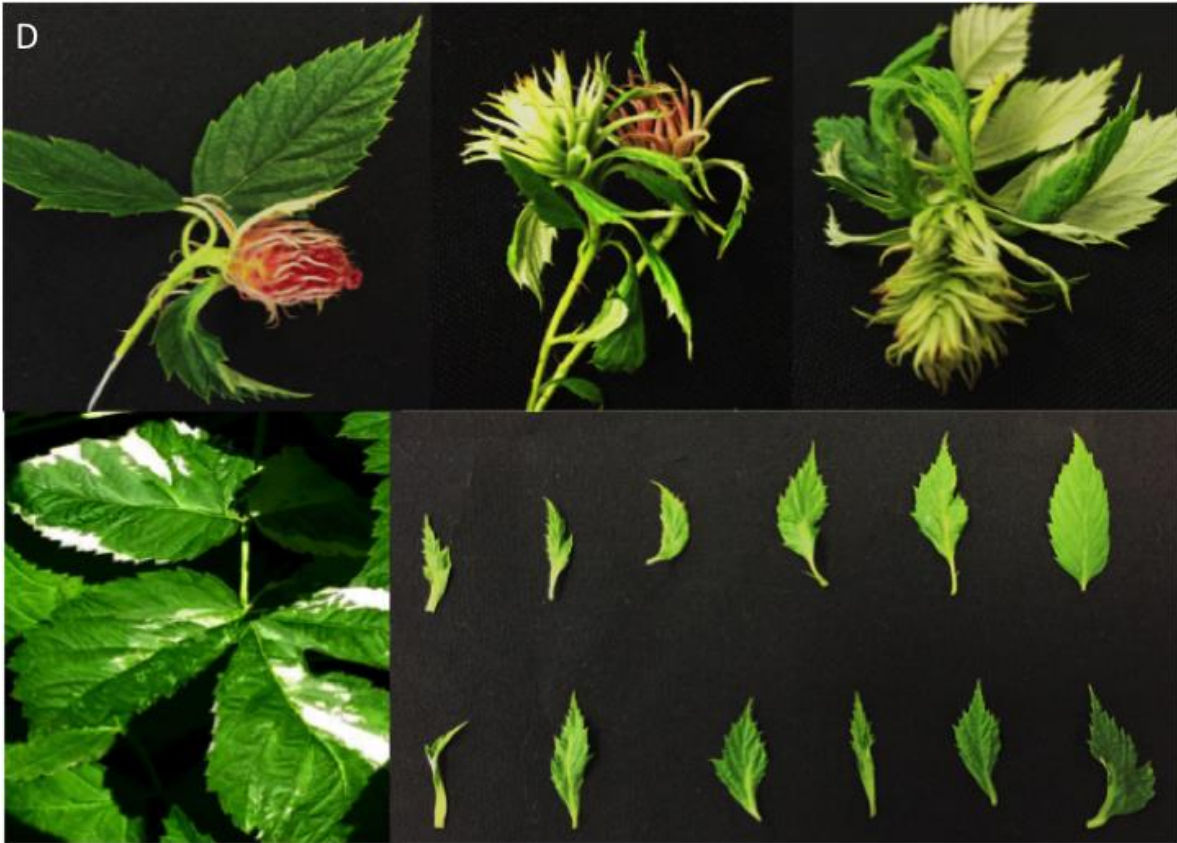

**Figure S2.** Symptoms detected in the berry plants analyzed in this study. **(A)** Strawberry plants showing symptoms previously described for SbGP disease featuring inedible fruit associated with the presence of green leaf-like structures. The symptoms depicted were associated with samples S12-P-JC, S10-P-JC, and S31-L-MB. **(B)** Blackberry showing inedible, yellowing fruit associated with the presence of green leaf-like structures (sample Bk01-L-JC). **(C)** Blueberry plants showing small leaves along with yellowing and redness in leaves (samples B101-L-JA and B102-L-JB). **(D)** Raspberry showing white leaf mosaic (R06-L-MC), little leaves and green structures in the fruits, a symptom referred to as ‘fruit witch’s broom’ (R01 to 03-L-MA).

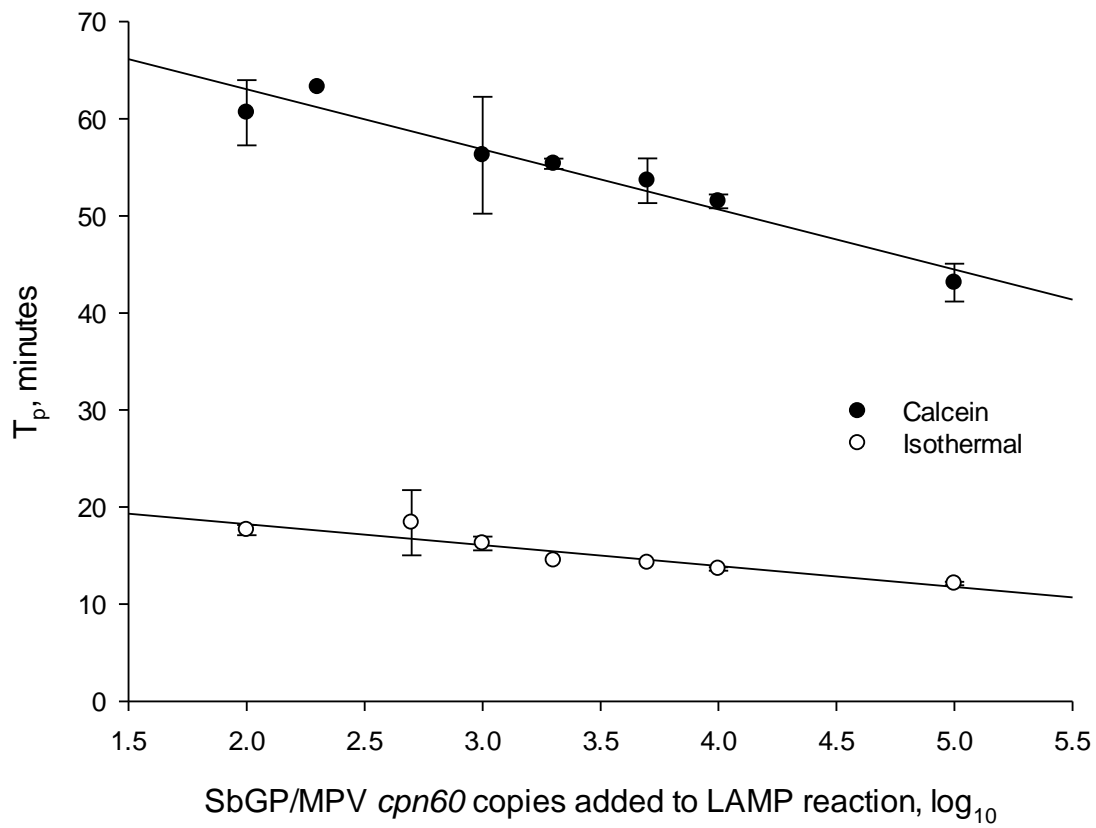

**Fig. S3.** LAMP assay linearity and detection limits. Assays were performed using calcein (closed circles) or isothermal (open circles) detection chemistry with known copy numbers of SbGP/MPV *cpn60* plasmids in a background of uninfected strawberry DNA.



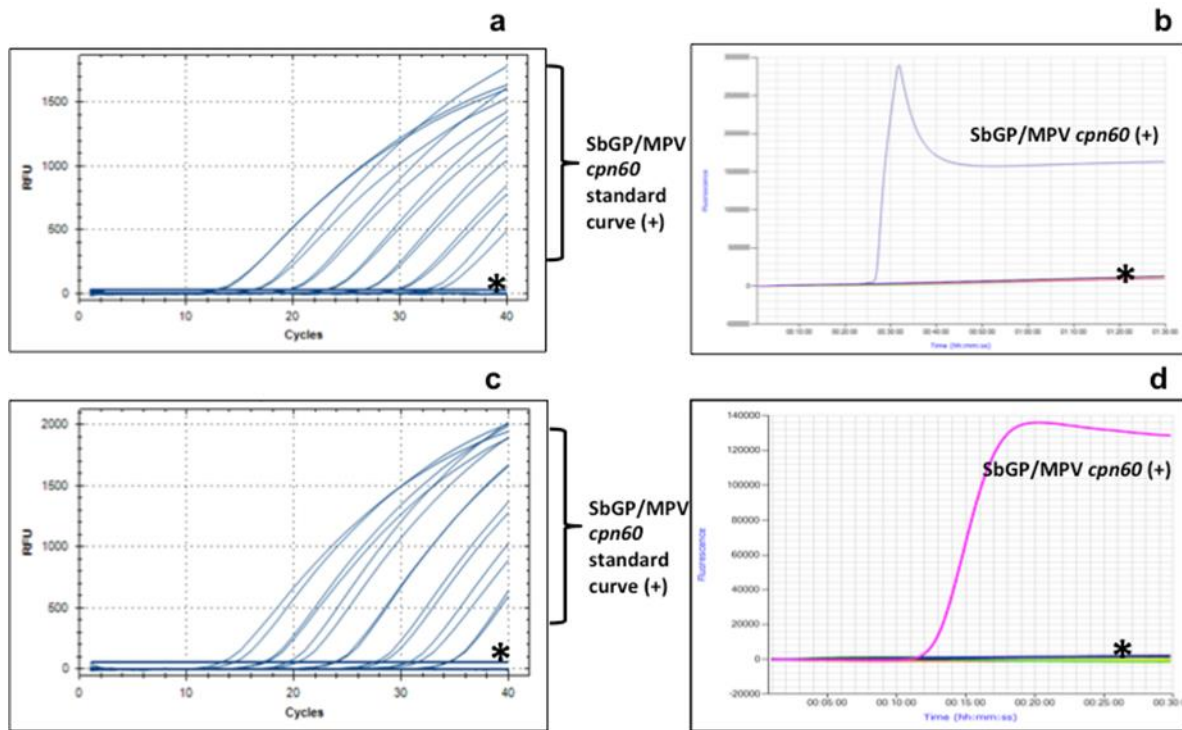

**Fig. S4.** Analytical specificity of the assays. **a.** and **c.** Quantitative PCR assay. **b.** and **d.** LAMP assay. **a.** and **b.** show a lack of assay signal (\*) using no template as well as genomic DNA templates isolated from plants affected by the following strains: **AY-Ruta** (16SrI-A, 'Ca. P. asteris'-related strain), **SF1** (16SrI-B, 'Ca. P. asteris'-related strain), **CVB**, **AY-Col** (16SrI-C, 'Ca. P. asteris'-related strain), **RS** (16SrV-A, 'Ca. P. ulmi'-related strain), **AshY** (16SrVII-A, 'Ca. P. fraxini'-related strain), **Cr** (16SrIX-H, 'Ca. P. phoenicium'-related strain), **AP** (16SrX-A, 'Ca. P. mali'-related strain), **PYLR** (16SrX-C, 'Ca. P. pyri'-related strain), **ESFY** (16SrX-F, 'Ca. P. prunorum'-related strain), and **BN44948** (16SrXII-A, 'Ca. P. solani'-related strain). **c.** and **d.** show a lack of signal (\*) using no template control and using genomic DNA extracted from uninfected strawberry, blueberry, blackberry, raspberry, and periwinkle plants.

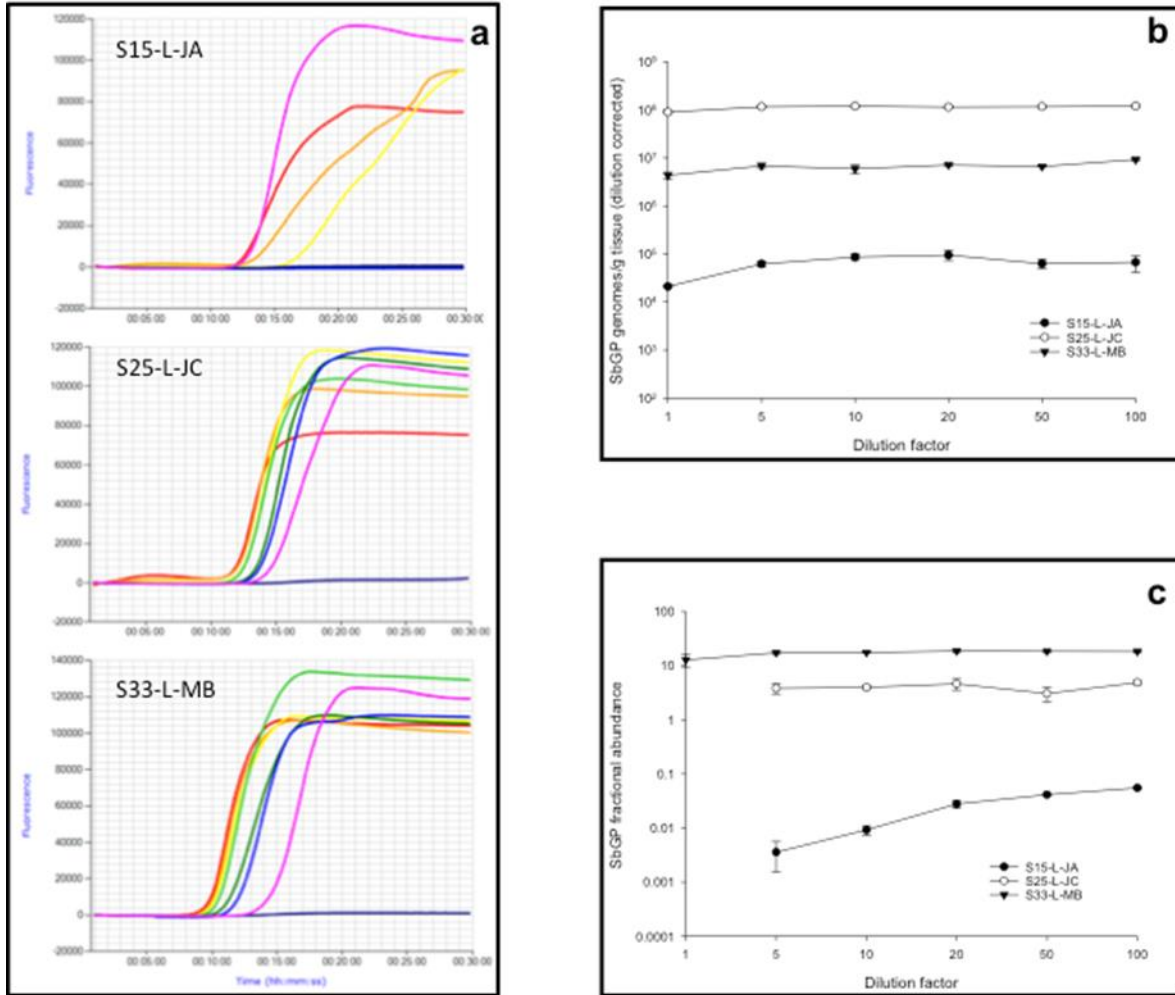

**Fig. S5.** Effect of dilution on the sensitivity of the LAMP, qRT-PCR, and ddPCR assays. **a.** Amplification curves obtained using LAMP assays where red is undiluted, orange 1:5, yellow 1:10, light green 1:20, dark green 1:50, light blue 1:10, dark blue no template control, and pink SbGP/MPV *cpn60* (+ control) of the corresponding sample. **b.** qRT-PCR dilution effect on the calculated number of genomes/g tissue. **c.** ddPCR dilution effect on the proportional abundance of SbGP genomes normalized to strawberry rubisco genes.

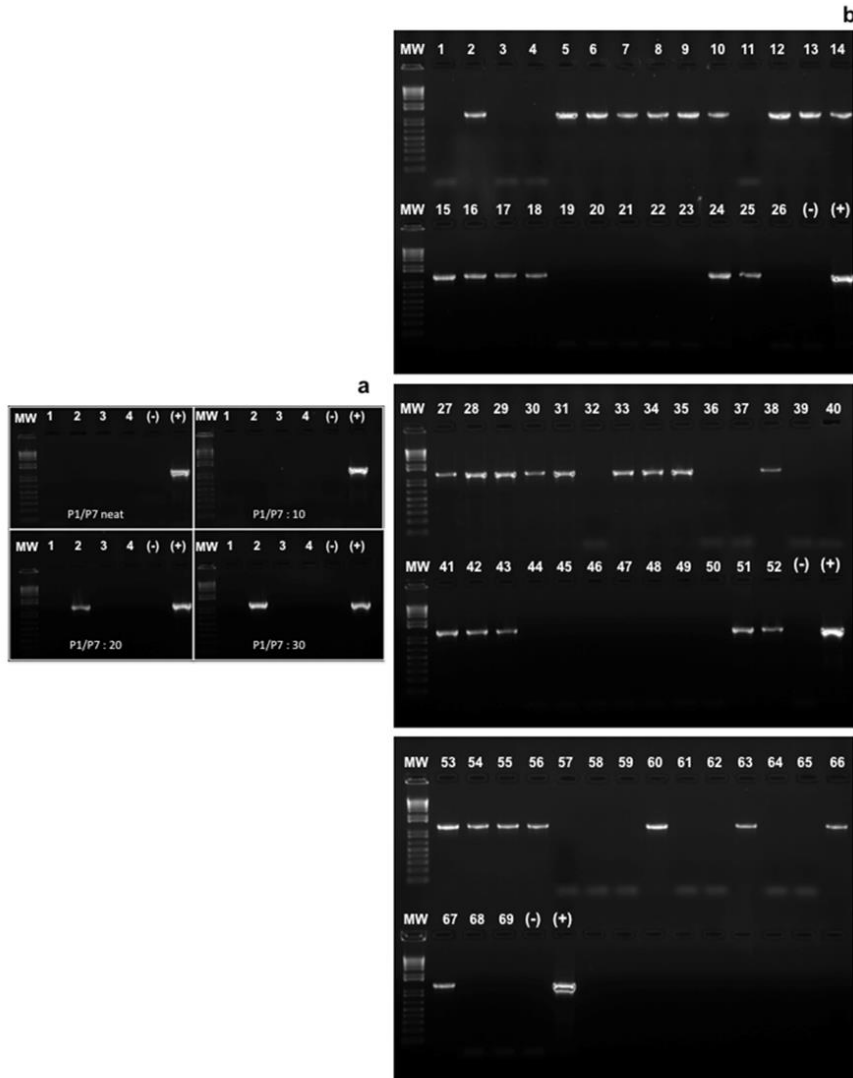

**Fig. S6.** F2nR2 gene fragment amplification of the samples collected in 2015 through nested PCR with P1/P7 primers in the first reaction, and R16F2n/R16R2 in the nested reaction. **a.** Dilution optimization of P1/P7 PCR product for use in the subsequent nested reaction. **b.** Electrophoresis of the nested PCR products of samples collected in 2015 with P1/P7 PCR product diluted 1:30. 1 to 55 is S01-L-MA to S43-L-JB (Table 1), 56 to 63 is R01-L-MA to R08-L-MC (Table 1), 64 to 65 is B101-L-JA to B102-L-JB (Table 1), 66 to 69 is Bk01-L-JC to Bk04-L-ME (Table 1).



**Table S1.** F2nR2 direct and nested and *cpn60* direct PCR discordant samples confirmed by sequencing of *cpn60* UT PCR product or the *cpn60* UT-based molecular diagnostics developed in this study.

| Sample    | F2nR2 PCR | <i>cpn60</i> PCR | <i>cpn60</i> LAMP | Fluorescent microsphere hybridization | <i>cpn60</i> sequencing | <i>cpn60</i> qRT-PCR <sup>a</sup> | <i>cpn60</i> ddPCR <sup>b</sup>     |
|-----------|-----------|------------------|-------------------|---------------------------------------|-------------------------|-----------------------------------|-------------------------------------|
| S11-L-JC  | +         | +                | +                 | SbGP/MPV                              | NT <sup>c</sup>         | 3.86x10 <sup>7</sup>              | 0.5650<br>(fractional abundance)    |
| S33-L-MB  | +         | +                | +                 | -                                     | SbGP/MPV<br>100%        | 2.02x10 <sup>6</sup>              | 19.35<br>(fractional abundance)     |
| S43-L-JB  | +         | +                | +                 | -                                     | ND <sup>d</sup>         | 1.51x10 <sup>5</sup>              | 0.0325<br>(fractional abundance)    |
| R01-L-MA  | +         | +                | +                 | NT                                    | SbGP/MPV<br>100%        | 1.87x10 <sup>5</sup>              | 2.66x10 <sup>6</sup><br>(genomes/g) |
| R01-P-MA  | +         | +                | +                 | NT                                    | NT                      | DNQ                               | 9.75x10 <sup>5</sup><br>(genomes/g) |
| R02-L-MA  | -         | +                | +                 | NT                                    | NT                      | DNQ                               | 1.31x10 <sup>5</sup><br>(genomes/g) |
| R03-L-MA  | -         | +                | +                 | NT                                    | ND                      | DNQ                               | 1.31x10 <sup>5</sup><br>(genomes/g) |
| R06-L-MC  | -         | +                | +                 | NT                                    | SbGP/MPV<br>100%        | 1.66x10 <sup>5</sup>              | 3.32x10 <sup>6</sup><br>(genomes/g) |
| R08-L-MC  | +         | +                | +                 | NT                                    | ND                      | 1.03x10 <sup>5</sup>              | 3.15x10 <sup>6</sup><br>(genomes/g) |
| Bk01-L-JC | -         | +                | +                 | NT                                    | ND                      | 8.87x10 <sup>4</sup>              | 3.13x10 <sup>6</sup><br>(genomes/g) |
| Bk03-L-MD | -         | +                | +                 | NT                                    | SbGP/MPV<br>100%        | 3.49x10 <sup>4</sup>              | 9.00x10 <sup>5</sup><br>(genomes/g) |
| Bl01-L-JA | +         | +                | +                 | NT                                    | SbGP/MPV<br>100%        | 1.34x10 <sup>5</sup>              | 2.79x10 <sup>6</sup><br>(genomes/g) |
| S22-L-MB  | +         | -                | +                 | SbGP/MPV                              | ND                      | 1.40x10 <sup>6</sup>              | 0.008<br>(fractional abundance)     |
| S06-P-MB  | +         | -                | +                 | SbGP/MPV                              | NT                      | 1.89x10 <sup>7</sup>              | 1.24<br>(fractional abundance)      |

<sup>a</sup>qRT-PCR data expressed as genomes/g tissue

<sup>b</sup>ddPCR data expressed as fractional abundance for S (Strawberry) samples or genomes/g tissue for R (raspberry), Bk (blackberry), and Bl (blueberry) samples.

<sup>c</sup> NT, not tested.

<sup>d</sup>ND, not determined. Samples from raspberry, blueberry, and blackberry yielded low amounts of PCR product that provided poor quality sequence in many cases.

GenBank accession number of the *cpn60* UT sequenced from the samples: S33-L-MB (KY061181), R01-L-MA (KY061169), R06-L-MC (KY061172), Bk03-L-MD (KY061185), and BI01-L-JA (KY061168).

---

| Primer name               | Sequence (5'-3')                              | Product size (bp) | Detection assay                       | Amplification conditions                                                 |                                                               |
|---------------------------|-----------------------------------------------|-------------------|---------------------------------------|--------------------------------------------------------------------------|---------------------------------------------------------------|
|                           |                                               |                   |                                       | qRT-PCR                                                                  | ddPCR                                                         |
| D0414                     | AGGGGCTAATCCTATTTTC                           | 132               | qRT-PCR and ddPCR                     | 1x 95°C, 3 min;                                                          | 1x 94°C, 10 min; 50x 94°C, 30 sec; 52°C, 1:00 (ramp 2°C/sec); |
| D0415                     | CCTGAAGAAATAGCTGCTA                           |                   |                                       | 40 x 95°C, 10 sec;                                                       |                                                               |
| SbGP                      | FAM-ATTAGCGTC/ZEN/TCAAGTGGTTTCTCAAA-IB        |                   |                                       | 72°C, 30 sec (data collection)                                           |                                                               |
| D0490                     | ACTACCTTGGCTCATTAT                            | 92                | ddPCR                                 |                                                                          | 1x 98°C, 10 min                                               |
| D0491                     | CCATGATTCTTCTGTCTATC                          |                   |                                       |                                                                          |                                                               |
| Frag-rubisco <sup>a</sup> | HEX-CAACGGTCT/ZEN/ACTTCTTCACATC-IB            |                   |                                       |                                                                          |                                                               |
| MS31_2-F3                 | AAAGGATTTGAAACCGAGTTA                         | 204               | LAMP                                  | 63°C 60 minutes (calcein detection) or 30 minutes (isothermal detection) |                                                               |
| MS31_2-B3                 | CCCTTAATTTATTAGCAACCAA                        |                   |                                       |                                                                          |                                                               |
| MS31_2-FIP                | ATTCAACCGCCATAGATTCTCT-GAAGTAGTTCAAGGTTTACAAT |                   |                                       |                                                                          |                                                               |
| MS31_2-BIP                | AACCATTAGTTTTAGTGACCGA-TTCAACTGATTCAGCTACAATT |                   |                                       |                                                                          |                                                               |
| MS31_2-loopF              | AATACGGAGAAGCATATCCTT                         |                   |                                       |                                                                          |                                                               |
| MS31_2-loopB              | AGAAGGTGTTGTTAAAGAATCT                        |                   |                                       |                                                                          |                                                               |
| SbGP <sup>b</sup>         | ACCACTTGAGACGCTAAT                            | 604               | Fluorescent microsphere hybridization |                                                                          |                                                               |

<sup>a</sup>Primers and probe designed using *Fragaria x ananassa* ribulose-bisphosphate carboxylase large subunit (*rbcL*), GenBank FAU06805

<sup>b</sup>hybridization capture probe used in combination with *cpn60*-targeted universal phytoplasma amplification primers as described <sup>2</sup>

**Table S2.** Sequences of amplification primers and hydrolysis probes used for detection and quantification of SbGP/MPV phytoplasmas.

| Sample     | DNA conc. ng/μl | PCR             |                                        |                                       |          | ddPCR                |            |                                 |            | LAMP (calcein) |      | LAMP Time to positive (Tp), minutes |                           | Tanneal, °C |
|------------|-----------------|-----------------|----------------------------------------|---------------------------------------|----------|----------------------|------------|---------------------------------|------------|----------------|------|-------------------------------------|---------------------------|-------------|
|            |                 | PCR1            | PCR2                                   | PCR3                                  | FMA type | SbGP <sup>c</sup>    | Sb-rubisco | qRT-PCR SbGP (genomes/g tissue) | host       | neat           |      | Calcein 1:50                        | Isothermal detection 1:50 |             |
|            |                 | F2nR2 (1:50)    | <i>cpn60</i> -univ <sup>a</sup> (1:50) | <i>cpn60</i> -FMA <sup>b</sup> (1:50) |          |                      |            |                                 |            | 1:50           | 1:50 |                                     |                           |             |
| S26b-GP-MA | NT <sup>d</sup> | pos             | pos                                    | NT <sup>d</sup>                       | NT       | 3.85X10 <sup>8</sup> | NT         | 1.12X10 <sup>9</sup>            | strawberry | pos            | NT   | 35.38                               | NT                        |             |
| S26b-P-MA  | NT              | NT <sup>e</sup> | NT                                     | NT                                    | NT       | 4.23X10 <sup>8</sup> | NT         | 1.04X10 <sup>9</sup>            | strawberry | pos            | NT   | 25.25                               | NT                        |             |
| S26b-F-MA  | NT              | NT <sup>e</sup> | NT                                     | NT                                    | NT       | 1.46X10 <sup>8</sup> | NT         | 3.98X10 <sup>8</sup>            | strawberry | pos            | NT   | 38.38                               | NT                        |             |
| S27b-GP-MA | NT              | pos             | pos                                    | NT                                    | NT       | 6.92X10 <sup>8</sup> | NT         | 4.01X10 <sup>9</sup>            | strawberry | pos            | NT   | 30.88                               | NT                        |             |
| S31b-L-MA  | NT              | pos             | pos                                    | NT                                    | NT       | 2.41X10 <sup>8</sup> | NT         | 4.82X10 <sup>8</sup>            | strawberry | pos            | NT   | 45.88                               | NT                        |             |
| S31b-GP-MA | NT              | NT <sup>e</sup> | pos                                    | NT                                    | NT       | 4.80X10 <sup>8</sup> | NT         | 2.74X10 <sup>9</sup>            | strawberry | pos            | NT   | 31.88                               | NT                        |             |
| S31b-P-MA  | NT              | NT <sup>e</sup> | NT                                     | NT                                    | NT       | 2.11X10 <sup>8</sup> | NT         | 4.34X10 <sup>8</sup>            | strawberry | pos            | NT   | 35.00                               | NT                        |             |
| S31b-F-MA  | NT              | NT <sup>e</sup> | NT                                     | NT                                    | NT       | 5.48X10 <sup>7</sup> | NT         | 9.69X10 <sup>7</sup>            | strawberry | pos            | NT   | 45.00                               | NT                        |             |
| S267-GP-MA | NT              | NT <sup>e</sup> | neg                                    | NT                                    | NT       | neg                  | NT         | 8.21X10 <sup>2</sup>            | strawberry | neg            | NT   | ND <sup>f</sup>                     | NT                        |             |
| S267-P-MA  | NT              | NT <sup>e</sup> | NT                                     | NT                                    | NT       | neg                  | NT         | neg                             | strawberry | neg            | NT   | ND                                  | NT                        |             |
| S267-F-MA  | NT              | NT <sup>e</sup> | NT                                     | NT                                    | NT       | neg                  | NT         | neg                             | strawberry | neg            | NT   | ND                                  | NT                        |             |
| S289-L-MA  | NT              | pos             | NT                                     | NT                                    | NT       | 7.94X10 <sup>7</sup> | NT         | 1.34X10 <sup>8</sup>            | strawberry | pos            | NT   | 49.63                               | NT                        |             |
| S289-GP-MA | NT              | NT <sup>e</sup> | NT                                     | NT                                    | NT       | neg                  | NT         | neg                             | strawberry | neg            | NT   | ND                                  | NT                        |             |
| S289-P-MA  | NT              | NT <sup>e</sup> | pos                                    | NT                                    | NT       | 7.16X10 <sup>7</sup> | NT         | 4.24X10 <sup>8</sup>            | strawberry | pos            | NT   | 35.38                               | NT                        |             |
| S289-F-MA  | NT              | NT <sup>e</sup> | NT                                     | NT                                    | NT       | neg                  | NT         | neg                             | strawberry | neg            | NT   | ND                                  | NT                        |             |
| S01-L-MA   | 16.9            | neg             | neg                                    | neg                                   |          | 0.0025               | pos        | DNQ <sup>g</sup>                | strawberry | neg            | neg  | NT                                  | neg                       |             |
| S01-P-MA   | 9.72            | pos             | pos                                    | pos                                   | SbGP     | 2.6300               | pos        | 1.94X10 <sup>7</sup>            | strawberry | pos            | pos  | NT                                  |                           | 13.5 81.14  |
| S02-P-JA   | 6.32            | neg             | neg                                    | neg                                   |          | 0.0095               | pos        | DNQ                             | strawberry | neg            | neg  | NT                                  | neg                       |             |
| S03-P-JB   | 5.28            | neg             | neg                                    | neg                                   |          | 0.0000               | pos        | DNQ                             | strawberry | neg            | neg  | NT                                  | neg                       |             |
| S04-L-MB   | 14.4            | pos             | pos                                    | pos                                   | SbGP     | 3.5900               | pos        | 5.50X10 <sup>7</sup>            | strawberry | pos            | pos  | NT                                  |                           | 15.25 81.09 |
| S05-L-MB   | 8.08            | pos             | pos                                    | pos                                   | SbGP     | 2.7800               | pos        | 2.21X10 <sup>7</sup>            | strawberry | pos            | pos  | NT                                  |                           | 13.75 81.09 |
| S05-P-MB   | 56.8            | pos             | pos                                    | pos                                   | SbGP     | 5.5300               | pos        | 1.47X10 <sup>8</sup>            | strawberry | pos            | pos  | NT                                  |                           | 13.75 81.14 |
| S06-L-MB   | 38.2            | pos             | pos                                    | pos                                   | SbGP     | 6.5950               | pos        | 2.23X10 <sup>8</sup>            | strawberry | pos            | pos  | NT                                  |                           | 13.5 81.14  |
| S06-P-MB   | 37.7            | pos             | neg                                    | pos                                   | SbGP     | 1.2400               | pos        | 1.89X10 <sup>7</sup>            | strawberry | pos            | pos  | NT                                  |                           | 13.75 81.09 |
| S07-P-JC   | 14.1            | pos             | pos                                    | pos                                   | SbGP     | 16.0850              | pos        | 2.61X10 <sup>8</sup>            | strawberry | pos            | pos  | NT                                  |                           | 12.5 81.24  |
| S08-L-JA   | 13.4            | neg             | neg                                    | neg                                   |          | 0.0200               | pos        | 2.09X10 <sup>5</sup>            | strawberry | neg            | neg  | NT                                  | neg                       |             |
| S09-L-MB   | 10.6            | pos             | pos                                    | pos                                   | SbGP     | 3.0100               | pos        | 1.83X10 <sup>7</sup>            | strawberry | pos            | pos  | NT                                  |                           | 13 81.27    |
| S09-P-MB   | 25.3            | pos             | pos                                    | pos                                   | SbGP     | 1.9150               | pos        | 5.04X10 <sup>7</sup>            | strawberry | pos            | pos  | NT                                  |                           | 13.75 81.09 |

|          |       |     |     |     |      |         |     |                      |            |     |     |    |       |       |
|----------|-------|-----|-----|-----|------|---------|-----|----------------------|------------|-----|-----|----|-------|-------|
| S10-L-JC | 11.5  | pos | pos | pos | SbGP | 11.6700 | pos | 3.75X10 <sup>8</sup> | strawberry | pos | pos | NT | 12.5  | 81.14 |
| S10-P-JC | 12.7  | pos | pos | pos | SbGP | 17.9500 | pos | 2.57X10 <sup>8</sup> | strawberry | pos | pos | NT | 13.5  | 81.19 |
| S11-L-JC | 20.7  | pos | pos | pos | SbGP | 0.5650  | pos | 3.86X10 <sup>7</sup> | strawberry | pos | pos | NT | 14    | 81.09 |
| S12-P-JC | 7.2   | pos | pos | pos | SbGP | 1.345   | pos | 6.52X10 <sup>6</sup> | strawberry | pos | pos | NT | 15    | 81.14 |
| S13-L-JC | 11.4  | pos | pos | pos | SbGP | 2.905   | pos | 2.35X10 <sup>7</sup> | strawberry | pos | pos | NT | 17.75 | 81.02 |
| S14-P-JA | 17    | neg | neg | neg |      | 0.013   | pos | 2.37X10 <sup>5</sup> | strawberry | pos | neg | NT | neg   |       |
| S15-L-JA | 21.5  | neg | neg | neg |      | 0.0025  | pos | 6.26X10 <sup>4</sup> | strawberry | pos | pos | NT | neg   |       |
| S16-P-JA | 9.88  | neg | neg | neg |      | 0.019   | pos | DNQ                  | strawberry | pos | neg | NT | neg   |       |
| S17-P-JA | 11    | neg | neg | neg |      | 0.007   | pos | 6.34X10 <sup>4</sup> | strawberry | pos | neg | NT | neg   |       |
| S18-P-JA | 10.6  | neg | neg | neg |      | 0.0375  | pos | 2.54X10 <sup>5</sup> | strawberry | pos | neg | NT | 22.75 | 81.09 |
| S19-L-JD | 8.48  | pos | pos | pos | SbGP | 3.305   | pos | 7.41X10 <sup>7</sup> | strawberry | pos | pos | NT | 14.25 | 81.05 |
| S19-P-JD | 7     | pos | pos | pos | SbGP | 2.415   | pos | 2.16X10 <sup>7</sup> | strawberry | pos | pos | NT | 14    | 81.15 |
| S20-L-JD | 12.8  | neg | neg | neg |      | 0.0025  | pos | DNQ                  | strawberry | neg | neg | NT | neg   |       |
| S21-L-MB | 8.56  | pos | pos | pos | SbGP | 0.64    | pos | 1.12X10 <sup>7</sup> | strawberry | pos | pos | NT | 16.75 | 81.14 |
| S21-P-MB | 7.44  | pos | pos | pos | SbGP | 0.315   | pos | 1.60X10 <sup>7</sup> | strawberry | pos | pos | NT | 15.5  | 81.15 |
| S22-L-MB | 14.2  | pos | neg | pos | SbGP | 0.008   | pos | 1.40X10 <sup>6</sup> | strawberry | pos | pos | NT | 15.25 | 81.1  |
| S22-P-MB | 13.2  | pos | pos | pos | SbGP | 0.995   | pos | 1.07X10 <sup>8</sup> | strawberry | pos | pos | NT | 13.5  | 81.06 |
| S23-L-MB | 15.4  | pos | pos | pos | SbGP | 14.195  | pos | 2.62X10 <sup>8</sup> | strawberry | pos | pos | NT | 12.75 | 81.05 |
| S24-P-JB | 9.24  | neg | neg | neg |      | 0.0135  | pos | DNQ                  | strawberry | pos | neg | NT | neg   |       |
| S25-L-JC | 19.6  | pos | pos | pos | SbGP | 3.05    | pos | 8.51X10 <sup>7</sup> | strawberry | pos | pos | NT | 14    | 81.07 |
| S25-P-JC | 3.97  | pos | pos | pos | SbGP | 1.365   | pos | 2.31X10 <sup>8</sup> | strawberry | pos | pos | NT | 13.25 | 80.97 |
| S26-L-JA | 17.8  | pos | pos | pos | SbGP | 3.065   | pos | 8.38X10 <sup>7</sup> | strawberry | pos | pos | NT | 14.25 | 80.95 |
| S26-P-JA | 15.2  | neg | neg | neg |      | 0.011   | pos | 4.64X10 <sup>4</sup> | strawberry | pos | pos | NT | neg   |       |
| S27-P-JA | 0.896 | neg | neg | neg |      | 0       | pos | 0.00                 | strawberry | neg | neg | NT | neg   |       |
| S28-L-MB | 0.808 | pos | pos | pos | SbGP | 6.95    | pos | 1.14X10 <sup>6</sup> | strawberry | pos | pos | NT | 13.25 | 81.09 |
| S29-L-MB | 2.38  | neg | neg | neg |      | 0.16    | pos | 4.45X10 <sup>4</sup> | strawberry | pos | neg | NT | neg   |       |
| S30-P-MB | 0.596 | neg | neg | neg |      | 0.07    | pos | 0.00                 | strawberry | pos | neg | NT | neg   |       |
| S31-L-MB | 0.832 | pos | pos | neg |      | 2.3     | pos | 3.02X10 <sup>5</sup> | strawberry | pos | pos | NT | 12.5  | 81.04 |
| S32-L-MB | 0.952 | pos | pos | neg |      | 2.55    | pos | 3.20X10 <sup>5</sup> | strawberry | pos | pos | NT | 12    | 81    |
| S33-L-MB | 0.876 | pos | pos | neg |      | 19.35   | pos | 2.02X10 <sup>6</sup> | strawberry | pos | pos | NT | 10.75 | 80.91 |
| S34-L-MC | 1.21  | neg | neg | neg |      | 0       | pos | 2.18X10 <sup>5</sup> | strawberry | pos | neg | NT | 15.25 | 80.96 |
| S35-L-MD | 1.44  | neg | neg | neg |      | 0.055   | pos | DNQ                  | strawberry | pos | pos | NT | 10.25 | 80.78 |
| S36-L-ME | 5.56  | neg | neg | neg |      | 5.95    | pos | 0.00                 | strawberry | neg | pos | NT | 11.5  | 80.81 |
| S37-P-MD | 1.2   | neg | neg | neg |      | 0       | pos | DNQ                  | strawberry | pos | neg | NT | 15.5  | 81.3  |

|           |      |     |     |     |             |                      |     |                      |            |     |     |       |       |       |
|-----------|------|-----|-----|-----|-------------|----------------------|-----|----------------------|------------|-----|-----|-------|-------|-------|
| S38-L-MF  | 2.66 | neg | neg | neg |             | 0.04                 | pos | DNQ                  | strawberry | pos | pos | NT    | 12.25 | 80.8  |
| S39-L-MG  | 2.03 | neg | neg | neg | NT          |                      | pos | 0.00                 | strawberry | neg | neg | NT    | 12.5  | 81.16 |
| S40-L-MH  | 1.29 | neg | neg | neg |             | 0.04                 | pos | 0.00                 | strawberry | neg | neg | NT    | 12.25 | 80.81 |
| S41-L-JB  | 8.4  | pos | pos | pos | AY-<br>OY-M | NT                   | pos | 6.52X10 <sup>4</sup> | strawberry | pos | pos | NT    | 10.5  | 80.92 |
| S41-P-JB  | 1.8  | pos | pos | pos | AY-<br>OY-M | 0.0565               | pos | 5.02X10 <sup>4</sup> | strawberry | pos | pos | NT    | 11    | 80.92 |
| S42-L-JB  | 3.43 | pos | pos | neg |             | 0.605                | pos | 1.64X10 <sup>6</sup> | strawberry | pos | pos | NT    | 9.75  | 80.89 |
| S43-L-JB  | 6.16 | pos | pos | neg |             | 0.0325               | pos | 1.51X10 <sup>5</sup> | strawberry | pos | pos | NT    | 10    | 80.92 |
| R01-L-MA  | 5.6  | pos | pos | NT  |             | 2.66X10 <sup>6</sup> | NT  | 1.87X10 <sup>5</sup> | raspberry  | pos | pos | NT    | 9.75  | 81.05 |
| R01-P-MA  | 1.44 | pos | pos | NT  |             | 9.75X10 <sup>5</sup> | NT  | DNQ                  | raspberry  | pos | pos | NT    | 10.5  | 81.15 |
| R02-L-MA  | 12.9 | neg | neg | NT  |             | 1.31X10 <sup>5</sup> | NT  | DNQ                  | raspberry  | pos | pos | NT    | 9.25  | 81.07 |
| R03-L-MA  | 3.7  | neg | pos | NT  |             | 1.31X10 <sup>5</sup> | NT  | DNQ                  | raspberry  | pos | pos | NT    | 9.5   | 81.02 |
| R04-L-MB  | 7.96 | neg | neg | NT  |             | 1.11X10 <sup>6</sup> | NT  | 5.36X10 <sup>4</sup> | raspberry  | pos | pos | NT    | 9.25  | 81    |
| R05-L-MC  | 17.1 | pos | pos | NT  |             | 5.44X10 <sup>6</sup> | NT  | 2.05X10 <sup>5</sup> | raspberry  | pos | pos | NT    | 9.5   | 81    |
| R06-L-MC  | 4.2  | neg | pos | NT  |             | 3.32X10 <sup>6</sup> | NT  | 1.66X10 <sup>5</sup> | raspberry  | pos | pos | NT    | 9.5   | 81.05 |
| R07-L-MC  | 9    | neg | neg | NT  |             | 7.13X10 <sup>5</sup> | NT  | DNQ                  | raspberry  | pos | pos | NT    | 9.5   | 81.2  |
| R08-L-MC  | 4.92 | pos | pos | NT  |             | 3.15X10 <sup>6</sup> | NT  | 1.03X10 <sup>5</sup> | raspberry  | pos | pos | NT    | 11.75 | 82.1  |
| Bk01-L-JC | 1.74 | neg | pos | NT  |             | 3.13X10 <sup>6</sup> | NT  | 8.87X10 <sup>4</sup> | blackberry | pos | pos | NT    | 11.5  | 80.86 |
| Bk02-L-JD | 3.54 | pos | pos | NT  |             | 1.50X10 <sup>6</sup> | NT  | 4.22X10 <sup>4</sup> | blackberry | pos | pos | NT    | 9.5   | 80.99 |
| Bk03-L-MD | 19.9 | neg | pos | NT  |             | 9.00X10 <sup>5</sup> | NT  | 3.49X10 <sup>4</sup> | blackberry | pos | pos | NT    | 8.75  | 81.09 |
| Bk04-L-ME | 26.5 | neg | neg | NT  |             | 0.00                 | NT  | DNQ                  | blackberry | neg | neg | NT    | neg   |       |
| BI01-L-JA | 3.56 | pos | pos | NT  |             | 2.79X10 <sup>6</sup> | NT  | 1.34X10 <sup>5</sup> | blueberry  | pos | pos | NT    | 9     | 81.05 |
| BI02-L-JB | 3.01 | neg | neg | NT  |             | 0.00                 | NT  | DNQ                  | blueberry  | pos | pos | NT    | 10.25 | 81.11 |
| P83-L-SLP |      | pos | pos | NT  |             | 2.53X10 <sup>9</sup> | NT  | 4.67X10 <sup>9</sup> | periwinkle | pos | NT  | 38.42 | NT    |       |
| P86-L-SLP |      | pos | pos | NT  |             | 2.82X10 <sup>9</sup> | NT  | 6.13X10 <sup>9</sup> | periwinkle | pos | NT  | 37.08 | NT    |       |

<sup>a</sup>*cpn60*-univ, PCR using *cpn60*-targeted universal phytoplasma primers<sup>2</sup>

<sup>b</sup>FMA, fluorescent microsphere hybridization assay

<sup>c</sup>ddPCR data expressed as genomes/g tissue extracted where internal control data is NT; otherwise expressed as fractional abundance

<sup>d</sup>NT, Not tested

<sup>e</sup>sample was neg using 16S-targeted pan-phytoplasma primers P1-Tint<sup>3</sup>

<sup>f</sup>ND, Not detected

<sup>g</sup>DNQ, Detectable but not quantifiable

**Table S3.** Complete results of all assays on all samples.



| Sample    | qRT-PCR genomes/g tissue |                    |
|-----------|--------------------------|--------------------|
|           | Mean (n)                 | Standard deviation |
| S03-P-JB  | DNQ (2)                  | -                  |
| S24-P-JB  | DNQ (2)                  | -                  |
| S41-L-JB  | $7.68 \times 10^6$ (2)   | $1.03 \times 10^6$ |
| S41-P-JB  | $8.61 \times 10^6$ (2)   | $5.07 \times 10^6$ |
| S42-L-JB  | 0 (2)                    | 0                  |
| S43-L-JB  | DNQ (2)                  | -                  |
| BI02-L-JB | DNQ (2)                  | -                  |

**Table S4.** Results obtained using AY-specific qRT-PCR on samples obtained from Jalisco-location B.

## REFERENCES

- 1 Tamura, K., Nei, M. & Kumar, S. Prospects for inferring very large phylogenies by using the neighbor-joining method. *Proc. Natl. Acad. Sci. U.S.A.* **101**, 11030-11035, doi:10.1073/pnas.0404206101 (2004).
- 2 Dumonceaux, T. J., Green, M., Hammond, C., Perez, E. & Olivier, C. Molecular diagnostic tools for detection and differentiation of Phytoplasmas based on chaperonin-60 reveal differences in host plant infection patterns. *PLoS ONE* **9**, e116039, doi:10.1371/journal.pone.0116039 (2014).
- 3 Smart, C. D. *et al.* Phytoplasma-specific PCR primers based on sequences of the 16S-23S rRNA spacer region. *Appl. Environ. Microbiol.* **62**, 2988-2993 (1996).
